# Supplementary material
Source: PubMed Central journal article supplement (PMC3674066)
Supplement: cc-12-1385-s01.pdf [file cc-12-1385-s01.pdf]

## **Supplemental Material to:**

**Xu Qian, Jing Yu, Yu Yin, Jun He, Lin Wang, Qi Li, Lou-Qian Zhang, Chong-Yong Li, Zhu-Mei Shi, Qing Xu, Wei Li, Li-Hui Lai, Ling-Zhi Liu and Bing-Hua Jiang**

**MicroRNA-143 inhibits tumor growth and angiogenesis and sensitizes chemosensitivity to oxaliplatin in colorectal cancers**

**2013; 12(9)**

**<http://dx.doi.org/10.4161/cc.24477>**

**<http://www.landesbioscience.com/journals/cc/article/24477>**

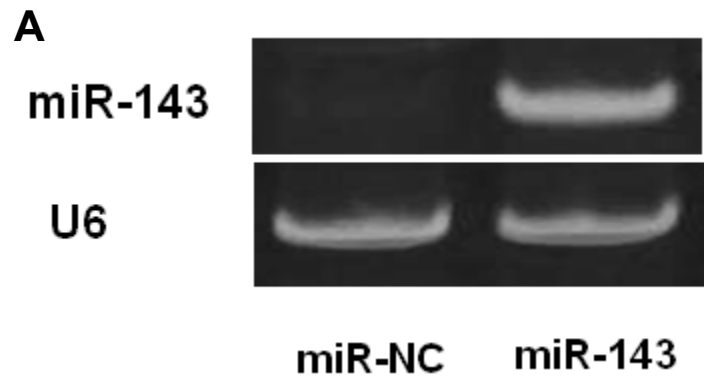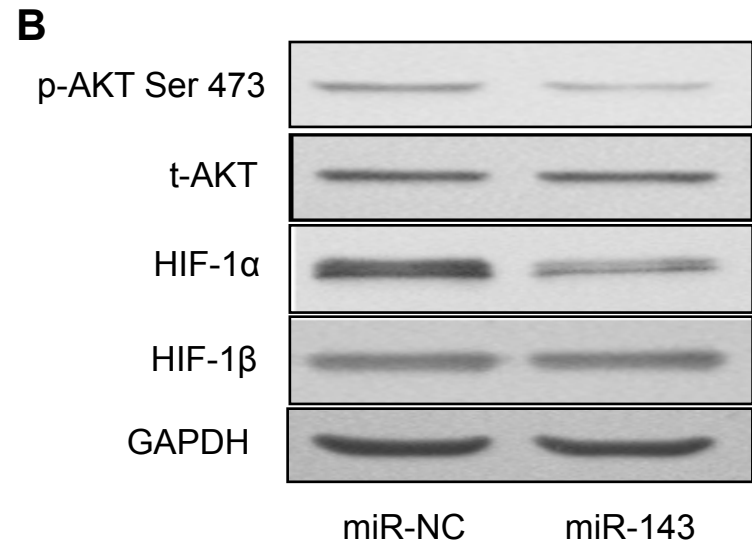

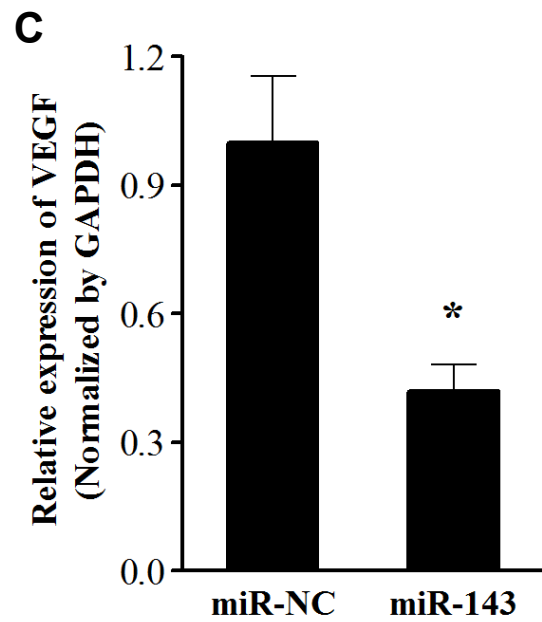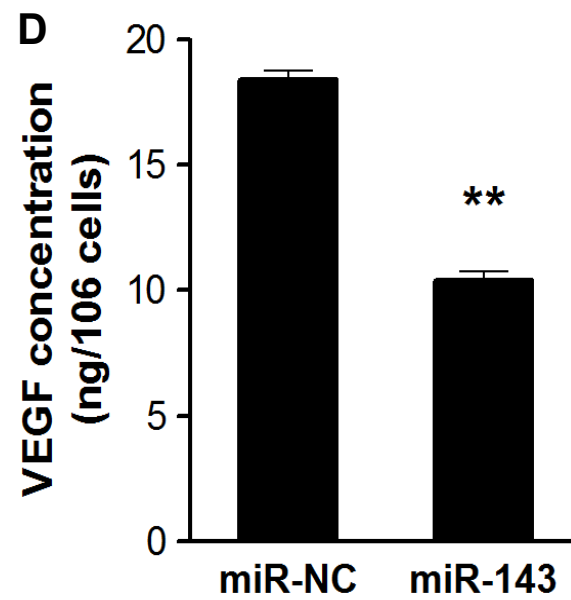

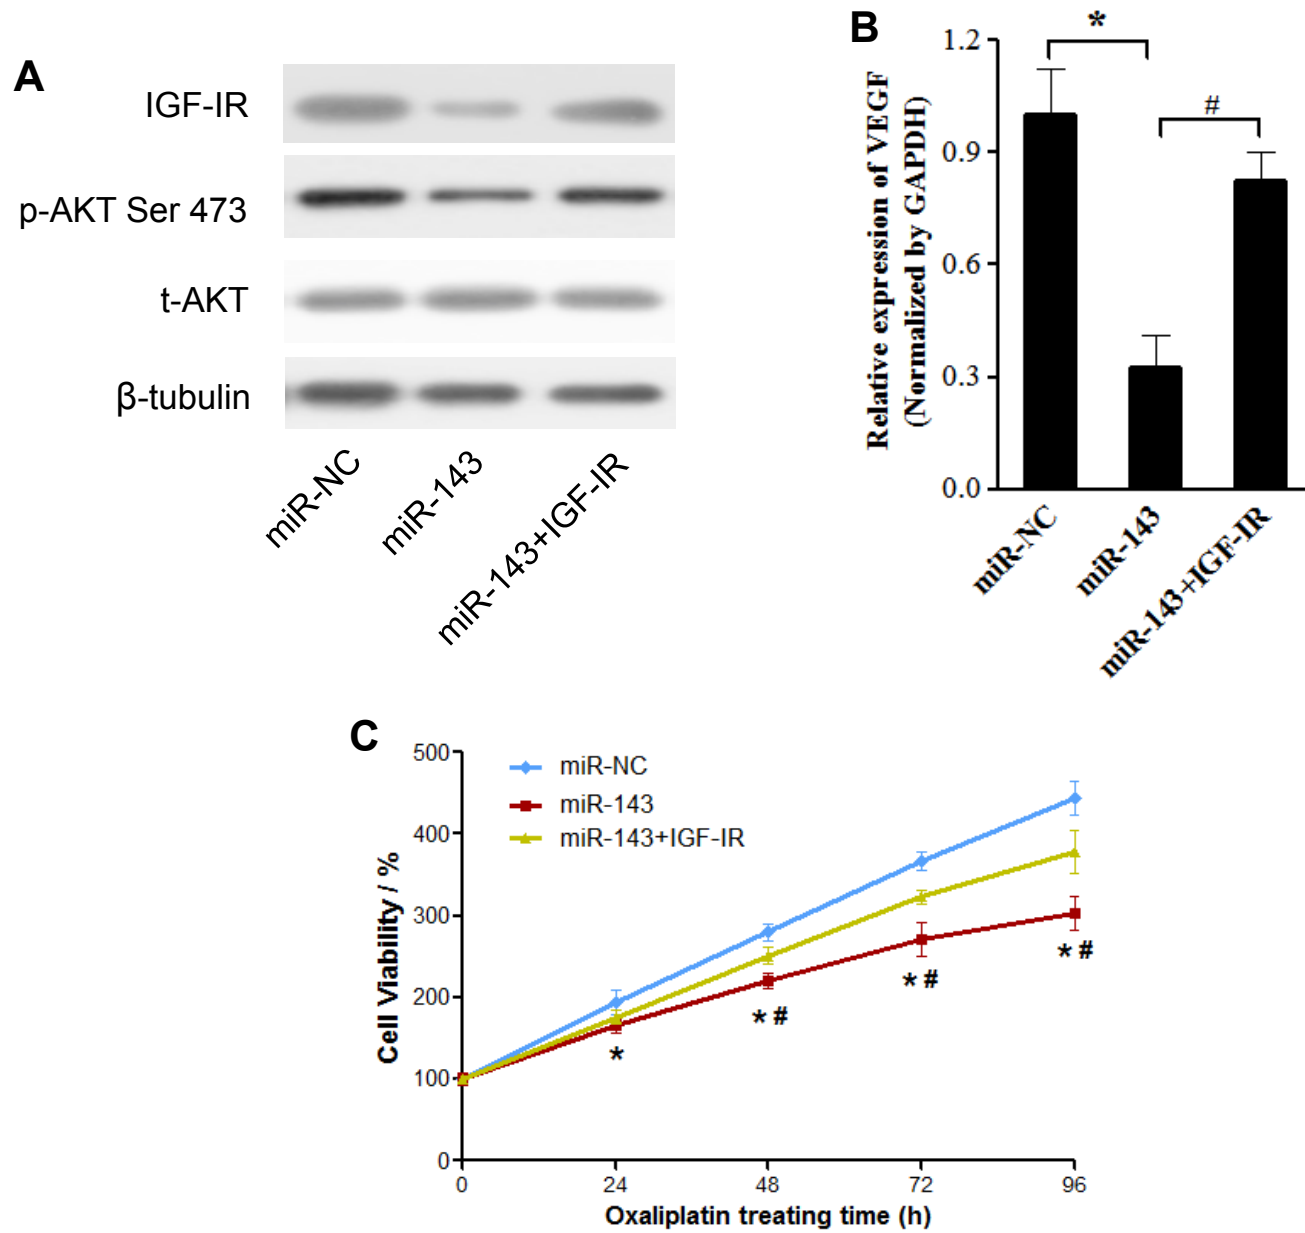

Qian et al., Supplementary Figure 2
